# Supplementary material
Source: HighWire-hosted journal article supplement (https://gut.bmj.com/content/gutjnl-2019-319706)

Q-Q plot of  $P$  values in IBD cohort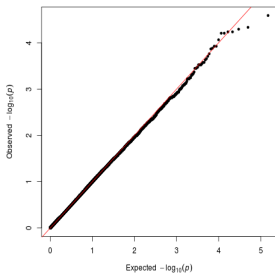Q-Q plot of  $P$  values in LifeLines-DEEP cohort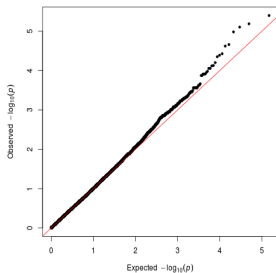

B

**Superpathway of acetyl-CoA biosynthesis**Q-Q plot of  $P$  values in IBD cohort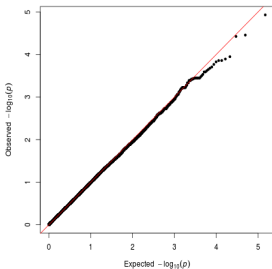Q-Q plot of  $P$  values in LifeLines-DEEP cohort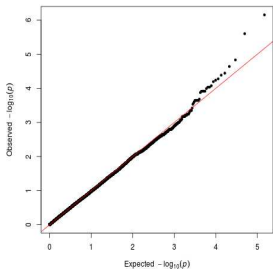

Supplement: inline-supplementary-material-3 [file inline-supplementary-material-3.pdf]
