# Supplementary material
Source: HighWire-hosted journal article supplement (https://gut.bmj.com/content/gutjnl-2019-319706)

**A** Thiamin diphosphate biosynthesis I\_rs10781497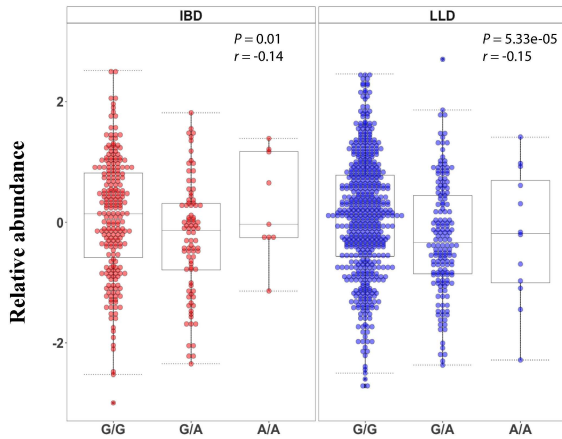Thiazole biosynthesis I (*E. coli*)\_rs10781497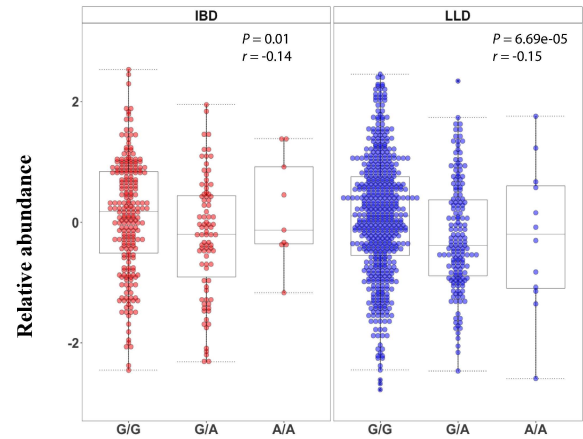**B** dTDP-L-rhamnose biosynthesis I\_rs74609208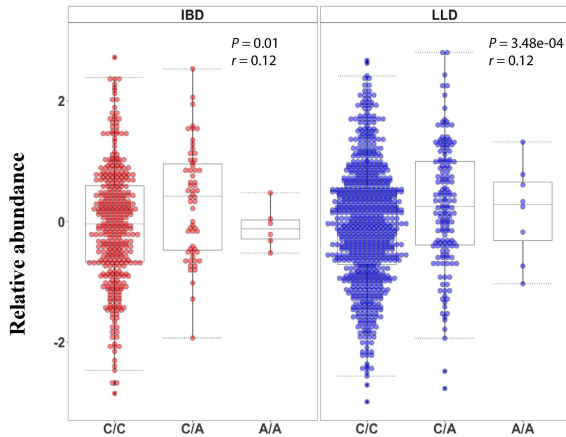

Supplement: inline-supplementary-material-4 [file inline-supplementary-material-4.pdf]
